# Supplementary material
Source: PubMed Central journal article supplement (PMC7643166)
Supplement: ao0c03396_si_001.pdf [file ao0c03396_si_001.pdf]

## Supporting information

# Enhancing the Extraction of Phenolic Compounds from Juniper Berry Using Box-Behnken Design

Noureddine Elboughdiri<sup>1,2,\*</sup>, Djamel Ghernaout<sup>1,3</sup>, Karim Kriaa<sup>4,2</sup>, Bassem Jamoussi<sup>5</sup>

<sup>1</sup>Chemical Engineering Department, College of Engineering, University of Ha'il, P.O. Box 2440, Ha'il 81441, Saudi Arabia

<sup>2</sup>Chemical Engineering Process Department, National School of Engineering Gabes, University of Gabes, Gabes 6011, Tunisia

<sup>3</sup>Chemical Engineering Department, Faculty of Engineering, University of Blida, P.O. Box 270, Blida 09000, Algeria

<sup>4</sup>College of Engineering, Al Imam Mohammad Ibn Saud Islamic University (IMSIU), PO Box 5701, Riyadh 11432, Saudi Arabia

<sup>5</sup>Department of Environmental Sciences, Faculty of Meteorology, Environment and Arid Land Agriculture, King Abdulaziz University, Jeddah, Saudi Arabia

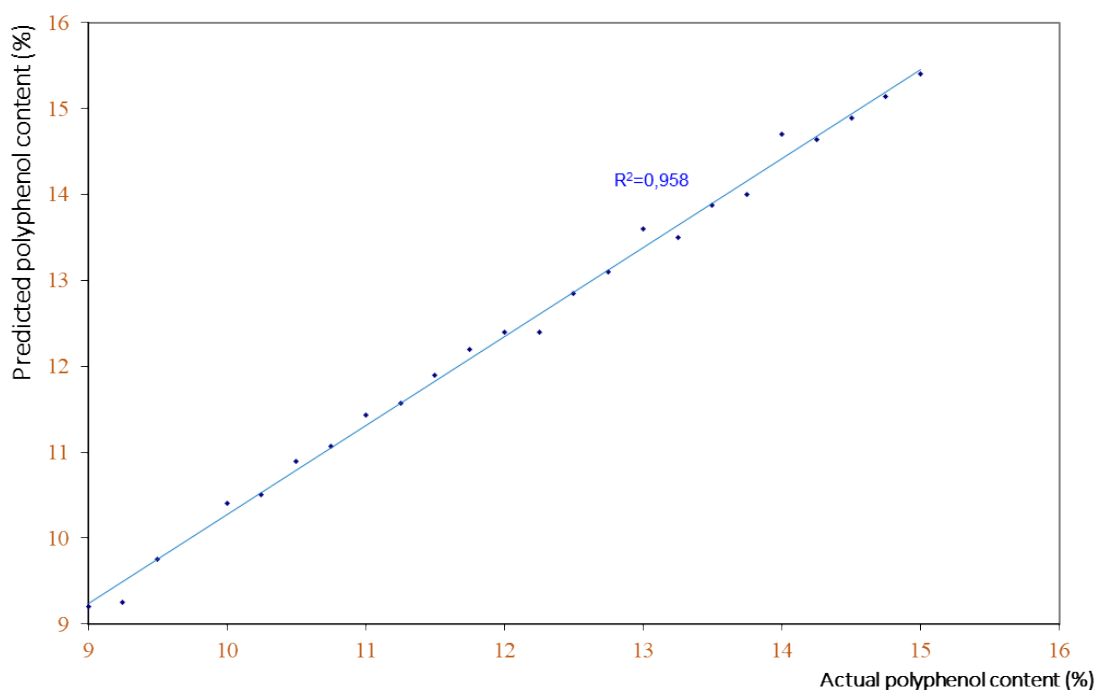

**Figure S1** Actual vs. predicted values for calibrations estimating polyphenol content.
